# Supplementary material for: Isomeric phenylenediacetates as modular tectons for a series of ZnII/CdII coordination polymers incorporating flexible bis(imidazole) co-ligands
Source: Royal Society of Chemistry journal article supplement (doi:10.1039/c2ce25076d), 2012-01-01
Supplement: c2ce25076d.pdf [file c2ce25076d.pdf]

***Supporting Information for***

**Isomeric phenylenediacetates as modular tecton for a series of Zn<sup>II</sup>/Cd<sup>II</sup>  
coordination polymers incorporating flexible bis (imidazole) co-ligands**

Ya-Pan Wu<sup>a,b</sup>, Dong-Sheng Li<sup>\*a,b</sup>, Jun Zhao<sup>a</sup>, Zi-Fan Fang<sup>a</sup>, Wen-Wen Dong<sup>a,b</sup>, Guo-Ping  
Yang<sup>a</sup> and Yao-Yu Wang<sup>\*b</sup>

*<sup>a</sup>College of Mechanical & Material Engineering, Research Institute of Materials, China Three Gorges  
University, Yichang, P. R. China*

*<sup>b</sup>Synthetic and Natural Functional Molecule Chemistry of Ministry of Education, Department of  
Chemistry, Northwest University, Xi'an 710069, China*

***CrystEngComm***

\* Corresponding authors

E-mail: [lidongsheng1@126.com](mailto:lidongsheng1@126.com) (D.-S. Li), Tel./Fax: +86-717-6397516;

E-mail: [wyaoyu@nwu.edu.cn](mailto:wyaoyu@nwu.edu.cn) (Y.-Y. Wang), Tel./Fax: +86-29-88303098.

**Table S1. Selected bond lengths [ $\text{\AA}$ ] and angles [ $^\circ$ ] for complex 1.**

| Complex 1   |            |               |            |
|-------------|------------|---------------|------------|
| Zn1-O2      | 1.932(4)   | Zn1-N1        | 1.998(4)   |
| Zn1-O3#1    | 1.943(3)   | Zn1-N4#2      | 1.994(4)   |
| O2-Zn1-N1   | 119.64(17) | O3#1-Zn1-N1   | 106.10(16) |
| O2-Zn1-N4#2 | 106.32(16) | O3#1-Zn1-N4#2 | 117.69(16) |
| O2-Zn1-O3#1 | 100.05(15) | N4#2-Zn1-N1   | 107.59(18) |

Symmetry transformations used to generate equivalent atoms: #1:  $-x+2, y+1/2, -z+1/2$ ; #2:  $x, y-1, z$ .

**Table S2. Selected bond lengths [ $\text{\AA}$ ] and angles [ $^\circ$ ] for complex 2.**

| Complex 2     |          |               |          |
|---------------|----------|---------------|----------|
| Cd1-O1        | 2.442(7) | Cd1-O4#2      | 2.269(6) |
| Cd1-O2        | 2.365(6) | Cd1-N1        | 2.239(7) |
| Cd1-O3#2      | 2.592(6) | Cd1-N4#1      | 2.225(6) |
| N4#1-Cd1-N1   | 115.4(2) | N4#1-Cd1-O4#2 | 109.0(2) |
| N1-Cd1-O4#2   | 114.2(2) | N4#1-Cd1-O2   | 134.0(2) |
| N1-Cd1-O2     | 93.3(2)  | O4#2-Cd1-O2   | 88.4(2)  |
| N4#1-Cd1-O1   | 86.2(2)  | N1-Cd1-O1     | 98.8(3)  |
| O4#2-Cd1-O1   | 130.9(3) | O2-Cd1-O1     | 52.9(2)  |
| N4#1-Cd1-O3#2 | 83.2(2)  | N1-Cd1-O3#2   | 87.1(2)  |
| O4#2-Cd1-O3#2 | 52.5(2)  | O2-Cd1-O3#2   | 136.1(2) |
| O1-Cd1-O3#2   | 169.3(2) |               |          |

Symmetry transformations used to generate equivalent atoms: #1  $x, y+1, z$ ; #2  $x-1/2, -y+3/2, z-1/2$ .

**Table S3. Selected bond lengths [ $\text{\AA}$ ] and angles [ $^\circ$ ] for complex 3.**

| Complex 3   |            |             |            |
|-------------|------------|-------------|------------|
| Zn1-O1      | 1.962(2)   | Zn1-N1      | 1.996(3)   |
| Zn1-O3#1    | 1.986(2)   | Zn1-N3      | 2.025(3)   |
| O1-Zn1-N3   | 107.35(12) | N3-Zn1-N1   | 110.49(11) |
| O1-Zn1-N1   | 118.59(11) | O3#1-Zn1-N3 | 98.27(11)  |
| O1-Zn1-O3#1 | 113.26(11) | O3#1-Zn1-N1 | 98.27(11)  |

Symmetry transformations used to generate equivalent atoms: #1 x, y+1, z.

**Table S4. Selected bond lengths [ $\text{\AA}$ ] and angles [ $^\circ$ ] for complex 4.**

| Complex 4   |            |               |            |
|-------------|------------|---------------|------------|
| Cd1-O1      | 2.2617(16) | Cd1-O4#2      | 2.3147(18) |
| Cd1-O2      | 2.2884(17) | Cd1-O5#2      | 2.3531(18) |
| Cd1-O3#1    | 2.3961(17) | Cd1-N1        | 2.261(2)   |
| O2-Cd1-O1   | 93.48(6)   | N1-Cd1-O3#1   | 92.52(7)   |
| O2-Cd1-N1   | 86.45(7)   | O2-Cd1-O3#1   | 111.56(6)  |
| N1-Cd1-O1   | 100.18(7)  | O2-Cd1-O4#2   | 166.92(7)  |
| N1-Cd1-O4#2 | 94.17(8)   | O5-Cd1-O3     | 86.88(6)   |
| O3#1-Cd1-O1 | 152.62(6)  | O4#2-Cd1-O1   | 99.26(6)   |
| O2-Cd1-O5#2 | 85.37(6)   | N1-Cd1-O5#2   | 170.94(7)  |
| O4-Cd1-O3   | 55.36(6)   | O4#2-Cd1-O5#2 | 92.93(7)   |
| O1-Cd1-O5#2 | 84.21(6)   | O1-Cd1-O5     | 84.21(6)   |

Symmetry transformations used to generate equivalent atoms: #1 -x+1,-y,-z; #2 -x,-y,-z+1.

**Table S5. Selected bond lengths [ $\text{\AA}$ ] and angles [ $^\circ$ ] for complex 5.**

| Complex 5     |           |               |           |
|---------------|-----------|---------------|-----------|
| Cd1-O1        | 2.357(3)  | Cd1-O4#2      | 2.396(2)  |
| Cd1-O2        | 2.465(3)  | Cd1-N1        | 2.270(2)  |
| Cd1-O3#2      | 2.331(2)  | Cd1-N4#1      | 2.242(2)  |
| O1-Cd1-O2     | 52.89(8)  | N1-Cd1-O1     | 94.17(10) |
| O1-Cd1-O4#2   | 125.38(9) | N1-Cd1-O2     | 92.03(10) |
| O3#2-Cd1-O1   | 90.10(9)  | N1-Cd1-O3#2   | 134.97(9) |
| O3#2-Cd1-O2   | 124.73(9) | N1-Cd1-O4#2   | 87.30(9)  |
| O4#2-Cd1-O2   | 178.11(8) | N4#1-Cd1-O1   | 135.10(9) |
| O3#2-Cd1-O4#2 | 55.06(8)  | N4#1-Cd1-O2   | 85.66(9)  |
| N4#1-Cd1-N1   | 104.92(9) | N4#1-Cd1-O3#2 | 103.10(9) |
| N4#1-Cd1-O4#2 | 96.22(10) |               |           |

Symmetry transformations used to generate equivalent atoms: #1  $x+1, y, z+1$ ; #2  $x+1, y, z$ .

**Table S6. Selected bond lengths [ $\text{\AA}$ ] and angles [ $^\circ$ ] for complex 6.**

| Complex 6 |          |             |          |
|-----------|----------|-------------|----------|
| Zn1-O1    | 1.941(5) | Zn1-N1      | 2.019(5) |
| Zn1-O4    | 1.943(5) | Zn1-N4      | 2.012(5) |
| O1-Zn1-N1 | 119.1(2) | O1-Zn1-O4#1 | 96.9(3)  |
| O1-Zn1-N4 | 112.3(3) | O4#1-Zn1-N4 | 116.9(2) |
| N1-Zn1-N4 | 98.0(2)  | O4#1-Zn1-N1 | 114.8(2) |

Symmetry transformations used to generate equivalent atoms: #1  $x-3/2, -y+1/2, z-1/2$ .

**Table S7. Selected bond lengths [ $\text{\AA}$ ] and angles [ $^\circ$ ] for complex 7.**

| Complex 7     |            |               |            |
|---------------|------------|---------------|------------|
| Cd1-O1        | 2.343(3)   | Cd1-O3#2      | 2.375(3)   |
| Cd1-O2        | 2.624(4)   | Cd1-N1        | 2.258(5)   |
| Cd1-O3#1      | 2.400(3)   | Cd1-N4#3      | 2.285(4)   |
| Cd1-O4#1      | 2.518(5)   |               |            |
| O1-Cd1-O2     | 51.99(13)  | N1-Cd1-O1     | 89.95(17)  |
| O1-Cd1-O3#1   | 159.84(12) | N1-Cd1-O2     | 87.57(15)  |
| O1-Cd1-O4#1   | 148.36(13) | N1-Cd1-N4#3   | 171.91(18) |
| O1-Cd1-O3#2   | 90.17(12)  | N1-Cd1-O3#2   | 87.99(15)  |
| O3#2-Cd1-O2   | 147.80(12) | N1-Cd1-O3#1   | 88.99(18)  |
| O3#2-Cd1-O3#1 | 69.75(13)  | N1-Cd1-O4#3   | 88.5(2)    |
| O3#2-Cd1-O4#1 | 121.38(12) | N4#3-Cd1-O3#2 | 99.10(13)  |
| O3#1-Cd1-O4#1 | 51.64(12)  | N4#3-Cd1-O3#1 | 94.80(13)  |
| N4#3-Cd1-O1   | 90.01(13)  | N4#3-Cd1-O4#1 | 87.34(16)  |
| N4#3-Cd1-O2   | 86.03(12)  | O4-Cd1-O2     | 96.36(13)  |
| O3-Cd1-O2     | 141.98(12) |               |            |

Symmetry transformations used to generate equivalent atoms: #1  $x+1/2, y-1/2, z$ ; #2  $-x, -y+2, -z+1$ ; #3  $x-1/2, -y+3/2, z+1/2$ .

**Table S8. Geometrical Parameters ( $\text{\AA}, ^\circ$ ) of Hydrogen Bonds for the  $(\text{H}_2\text{O})_6$  cluster <sup>a</sup>**

| D-H...A            | d(D-H) | d(H...A) | d(D-A)   | <(DHA) |
|--------------------|--------|----------|----------|--------|
| O2W-H2WB...O1W     | 0.70   | 2.31     | 2.835(2) | 136.5  |
| O3W#2-H3WB...O2W   | 0.89   | 2.01     | 2.826(2) | 151.7  |
| O1W#3-H1WA...O3W#2 | 0.90   | 1.97     | 2.830(2) | 159.1  |
| O2W#3-H2WB...O1W#3 | 0.70   | 2.31     | 2.835(2) | 136.5  |
| O3W#1-H3WB...O2W#3 | 0.89   | 2.01     | 2.826(2) | 151.7  |
| O1W-H1WA...O3W#1   | 0.90   | 1.97     | 2.830(2) | 159.1  |

<sup>a</sup> Symmetry transformations used to generate equivalent atoms: #1:  $1-x, 1-y, 2-z$ ; #2:  $1+x, y, z$ ; #3:  $2-x, 1-y, 2-z$ .

**Scheme S1. Conformations of biim-n (n=3, 4, 5, 6) in coordination complexes (T = trans and G =gauche)**

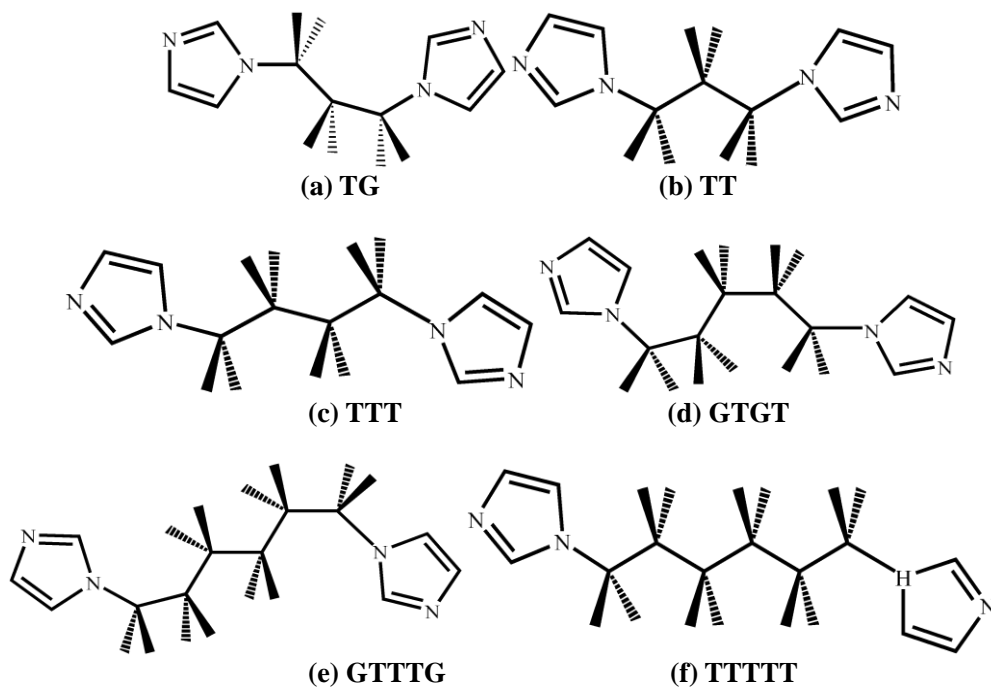

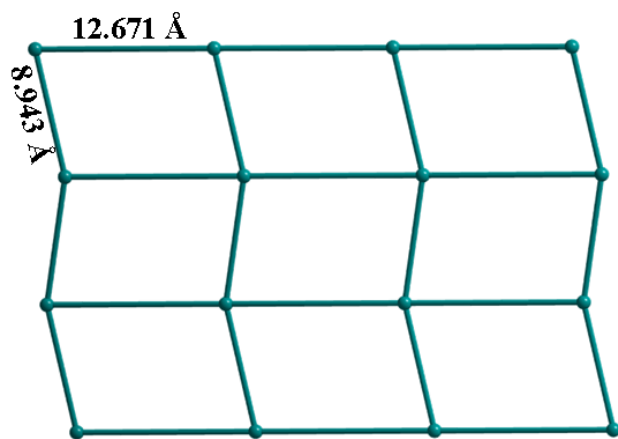

**Fig. S1** Schematic representation of undulated 4-sql net in **2**.

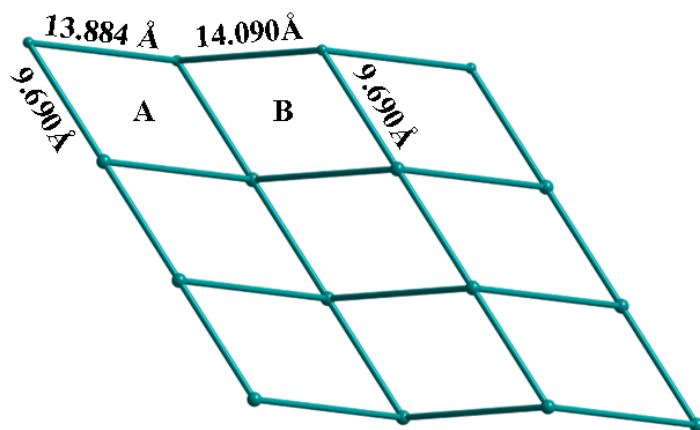

**Fig. S2** Schematic representation of undulated 4-sql net in **3**.

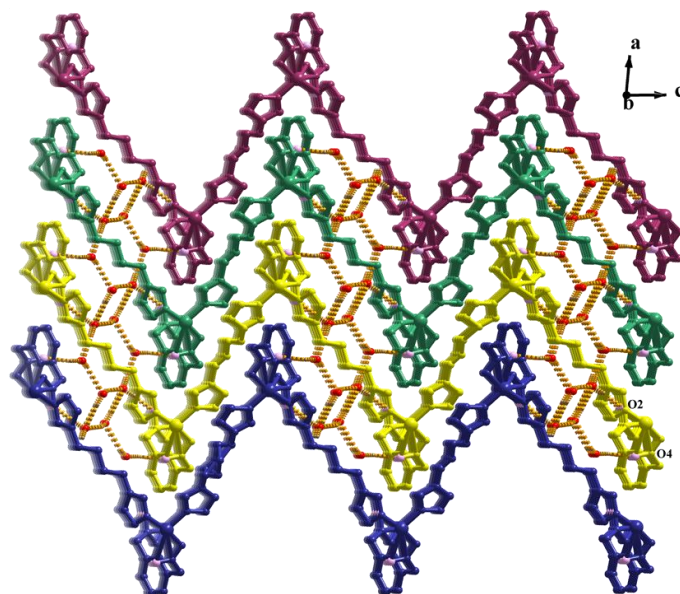

**Fig. S3** Packing diagram of the 3D supramolecular network in **3** viewed along the crystallographic *b* axis, all the hydrogen atoms were omitted for clarity.

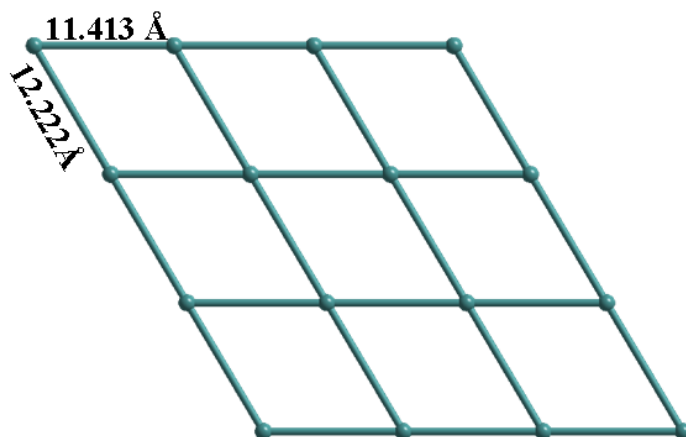

**Fig. S4** Schematic representation of planar 4-sqI net in **5**.



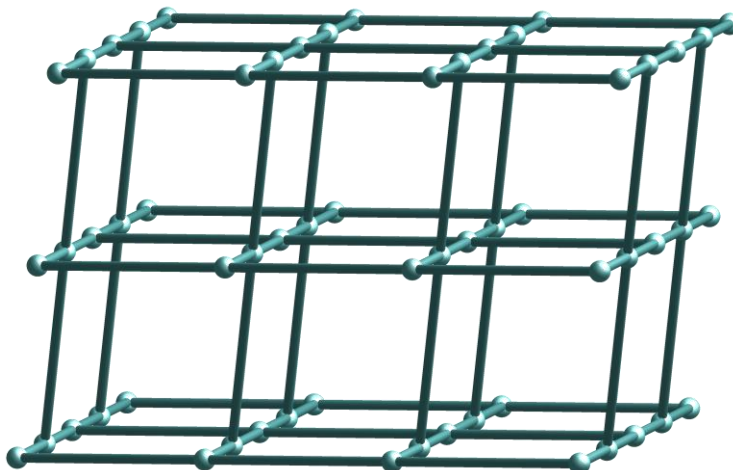

**Fig. S5** Schematic representation of 3D 4-connected CdS topology with point symbol of  $(4^2 \cdot 6)(4^2 \cdot 6^3 \cdot 8^3)$ .

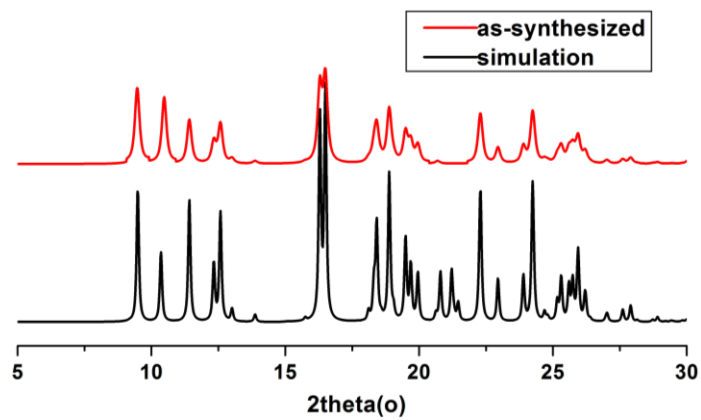

**Fig. S6** X-Ray power diffraction profiles of complex 1.

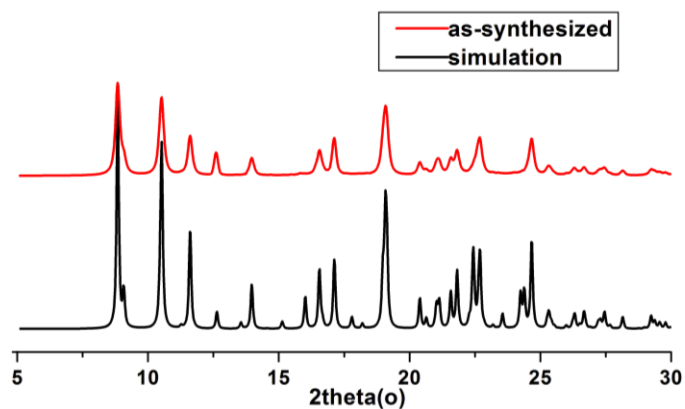

**Fig. S7** X-Ray power diffraction profiles of complex 2.

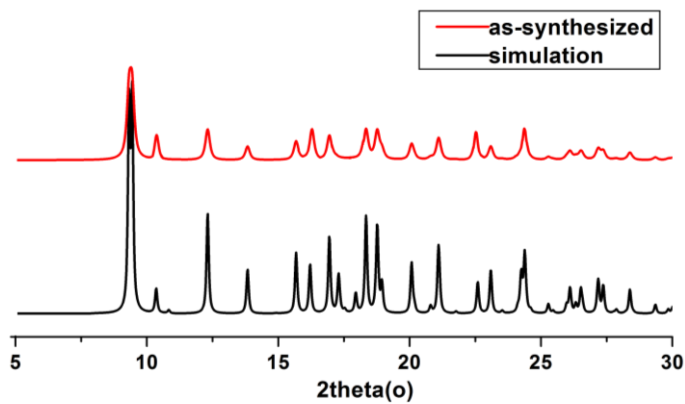

**Fig. S8** X-Ray power diffraction profiles of complex 4.

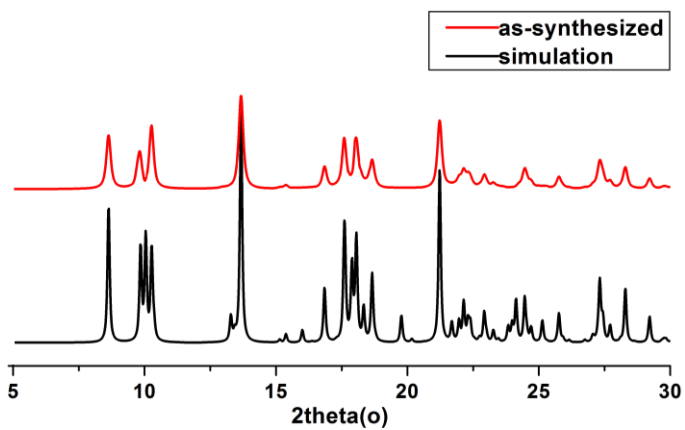

**Fig. S9** X-Ray power diffraction profiles of complex 5.

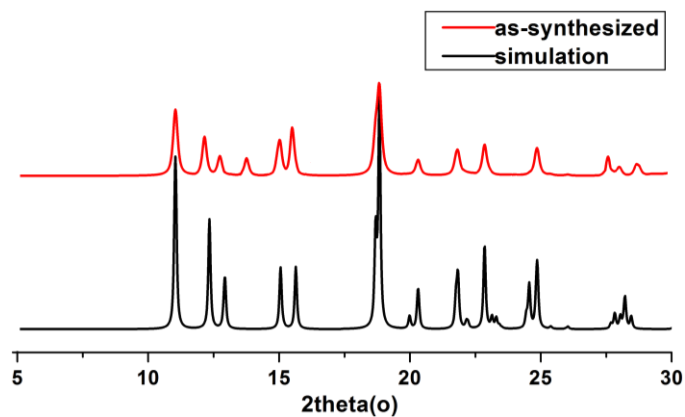

**Fig. S10** X-Ray power diffraction profiles of complex **6**.

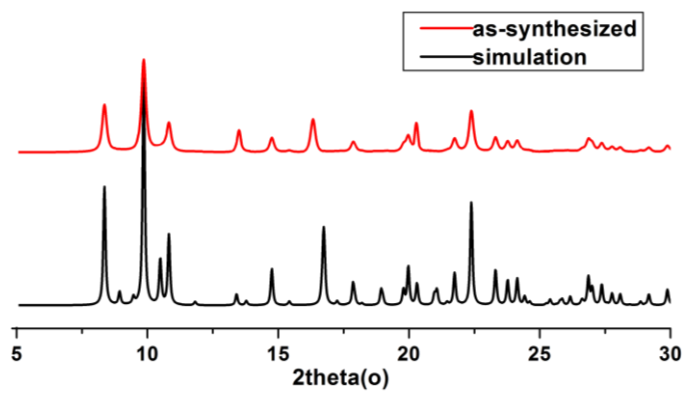

**Fig.S11** X-Ray power diffraction profiles of complex **7**.

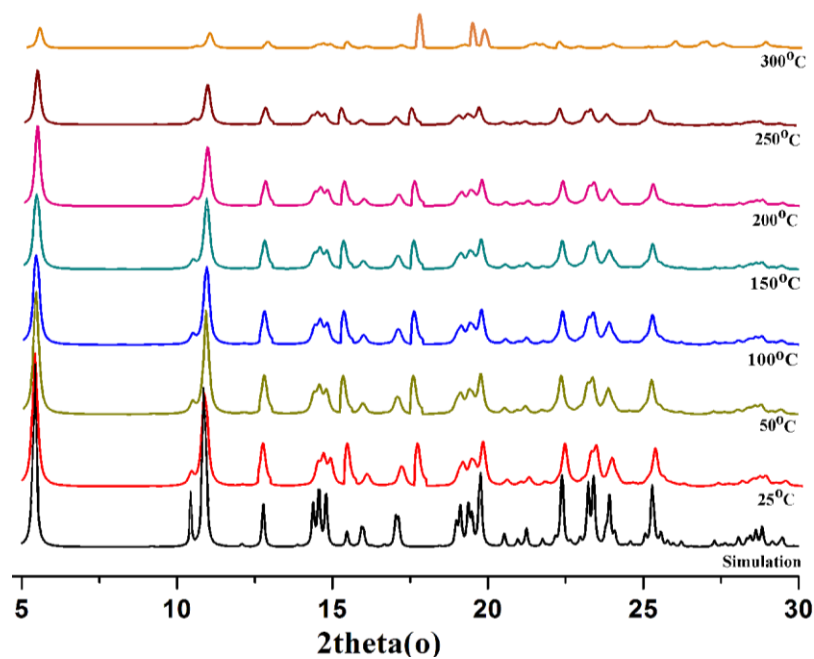

Fig. S12 Variable-temperature XRD patterns of complex 3.

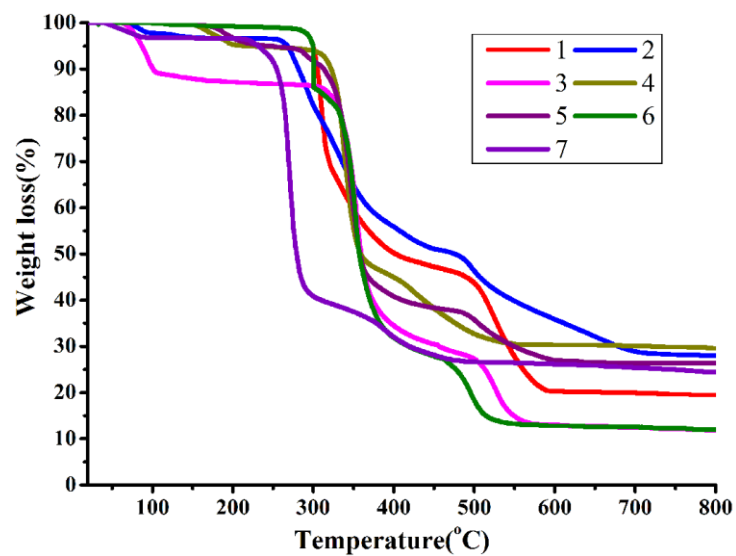

Fig. S13 The TGA of complexes 1-7.
